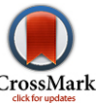

## Correction

# Correction: *De Novo* Assembly of Expressed Transcripts and Global Transcriptomic Analysis from Seedlings of the Paper Mulberry (*Broussonetia kazinoki* x *Broussonetia papyifera*)

## The PLOS ONE Staff

There are errors in the accession numbers in the Materials and Methods and Results.

The last sentence of the cDNA Library Preparation and Sequencing (RNA-seq) section of the Materials and Methods should read: Raw sequence data were generated by the Illumina pipeline and are available in NCBI's Short Read Archive (SRA) database (<http://www.ncbi.nlm.nih.gov/Traces/sra/sra.cgi>) under accession number SRP029966.

The last sentence of the RNA-seq and De novo Transcriptome Assembly section of the Results should read: The transcriptome data were deposited in NCBI's Short Read Archive (SRA) database under accession number of SRP029966.

## Reference

1. Xianjun P, Linhong T, Xiaoman W, Yucheng W, Shihua S (2014) *De Novo* Assembly of Expressed Transcripts and Global Transcriptomic Analysis from Seedlings of the Paper Mulberry (*Broussonetia kazinoki* x *Broussonetia papyifera*). PLoS ONE 9(5): e97487. doi:10.1371/journal.pone.0097487

**Citation:** The PLOS ONE Staff (2014) Correction: *De Novo* Assembly of Expressed Transcripts and Global Transcriptomic Analysis from Seedlings of the Paper Mulberry (*Broussonetia kazinoki* x *Broussonetia papyifera*). PLoS ONE 9(9): e108613. doi:10.1371/journal.pone.0108613

**Published:** September 12, 2014

**Copyright:** © 2014 The PLOS ONE Staff. This is an open-access article distributed under the terms of the Creative Commons Attribution License, which permits unrestricted use, distribution, and reproduction in any medium, provided the original author and source are credited.
